# Supplementary material
Source: PubMed Central journal article supplement (PMC9664957)
Supplement: jb.00175-22-s0001.pdf [file jb.00175-22-s0001.pdf]

## SUPPLEMENTAL INFORMATION

The proteomic and transcriptomic landscapes altered by Rgg2/3 activity in *Streptococcus pyogenes*.

Britta E. Rued,<sup>a</sup> Caleb M. Anderson,<sup>a</sup> Michael J. Federle<sup>a#</sup>.

<sup>a</sup>Department of Pharmaceutical Sciences. University of Illinois at Chicago, Chicago, Illinois, USA

Running Head: Rgg2/3 disruption alters *S. pyogenes* expression landscape.

#Address correspondence to Michael J. Federle, [mfederle@uic.edu](mailto:mfederle@uic.edu)

### Contents

|                                                                                                                                                                                           |           |
|-------------------------------------------------------------------------------------------------------------------------------------------------------------------------------------------|-----------|
| <b>Figure S1. Proteomics workflow and summary of results</b> .....                                                                                                                        | <b>2</b>  |
| <b>Figure S2. Data from proteomics analysis</b> .....                                                                                                                                     | <b>4</b>  |
| <b>Figure S3. Results examining effects of Rgg2/3 QS induction on cells and qRT-PCR results</b> .....                                                                                     | <b>6</b>  |
| <b>Figure S4. Growth curves of complementation and multi-copy strains for putative stringent response enzymes, and examination of transcriptional response to the Rgg2/3 system</b> ..... | <b>8</b>  |
| <b>Table S1. Bacterial strains, plasmids, and primers used in this study</b> .....                                                                                                        | <b>10</b> |
| <b>Table S2. Doubling times of strains with or without 100 nM SHP or revSHP peptide</b> .....                                                                                             | <b>17</b> |
| <b>References for Supplemental Information</b> .....                                                                                                                                      | <b>19</b> |

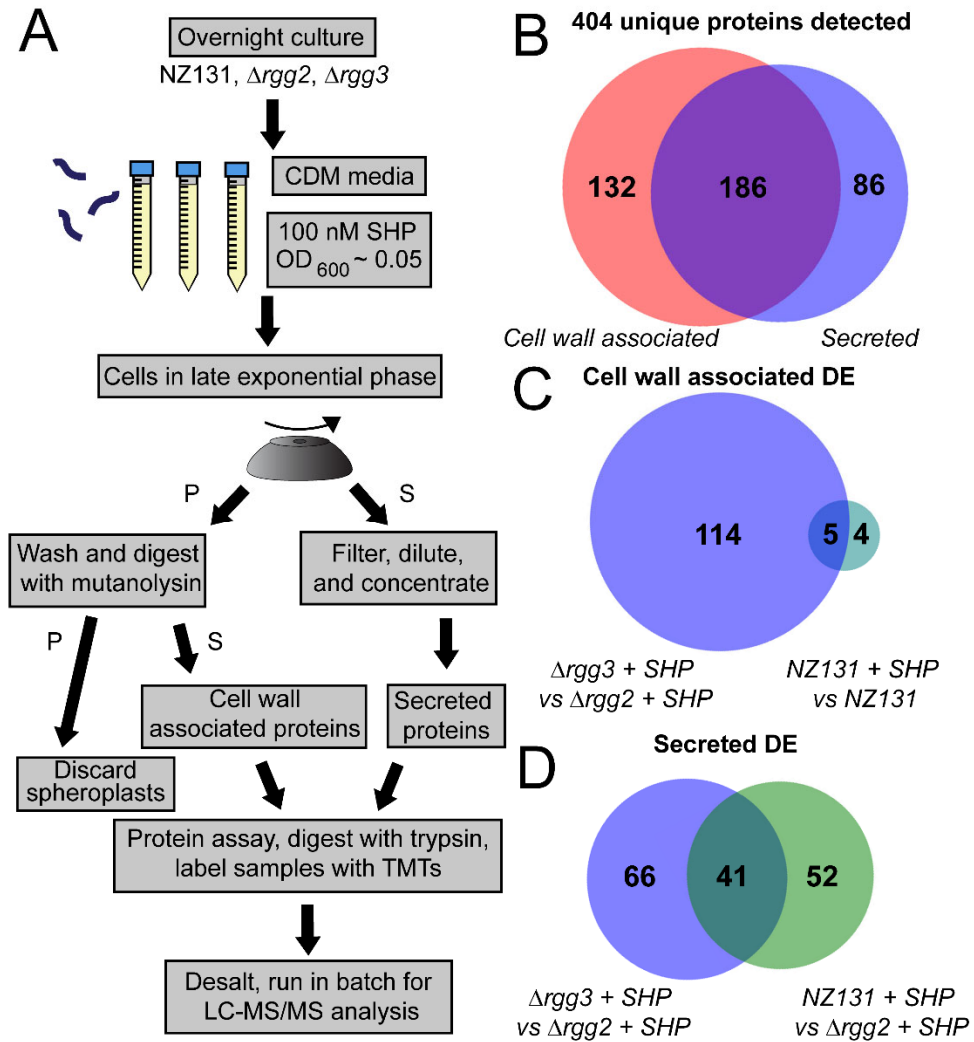

**FIGURE S1:** Proteomics workflow and summary of results. For a complete list of differentially expressed proteins, TMT-LC-MS/MS results, and comparison to Wilk *et. al*, 2018 proteomics data set see Data Sets S2-S3. A) Overnight cultures were diluted 1:100 into CDM, grown statically at 37°C until  $OD_{600} \sim 0.05$  at which time 100 nM SHP was added to appropriate cultures. Cells were harvested by centrifugation in late exponential phase ( $OD_{600} \sim 0.8-1.0$ ) and split into pellet (P) and supernatant (S) fractions. To obtain the “cell wall associated proteins” cell pellets were washed with cold buffers and digested with mutanolysin 18 hrs at 37°C. The “secreted proteins” were obtained from culture supernatants that were filtered, diluted with PBS, and concentrated several times. All

samples were digested with trypsin, labeled with tandem mass tags, and analyzed in batch via LC-MS/MS. For further details see *Materials and Methods*. B) Number of unique proteins detected via TMT-LC-MS/MS. The pink circle indicates number of proteins detected in the cell wall associated fraction, whereas the blue circle indicates the number of proteins detected in the supernatant fraction. The area of overlap indicates the number of unique proteins detected in both samples. C) Number of differentially expressed cell wall associated proteins between  $\Delta rgg3$  and  $\Delta rgg2$  cultures stimulated with 100 nM SHP (blue) and wild-type NZ131 + SHP vs NZ131 (green). The overlap indicates the number of proteins that were differentially expressed in both data sets. D) Number of differentially expressed secreted proteins between  $\Delta rgg3$  and  $\Delta rgg2$  cultures stimulated with 100 nM SHP (blue) and wild-type NZ131 + SHP vs  $\Delta rgg2$  + SHP (green).

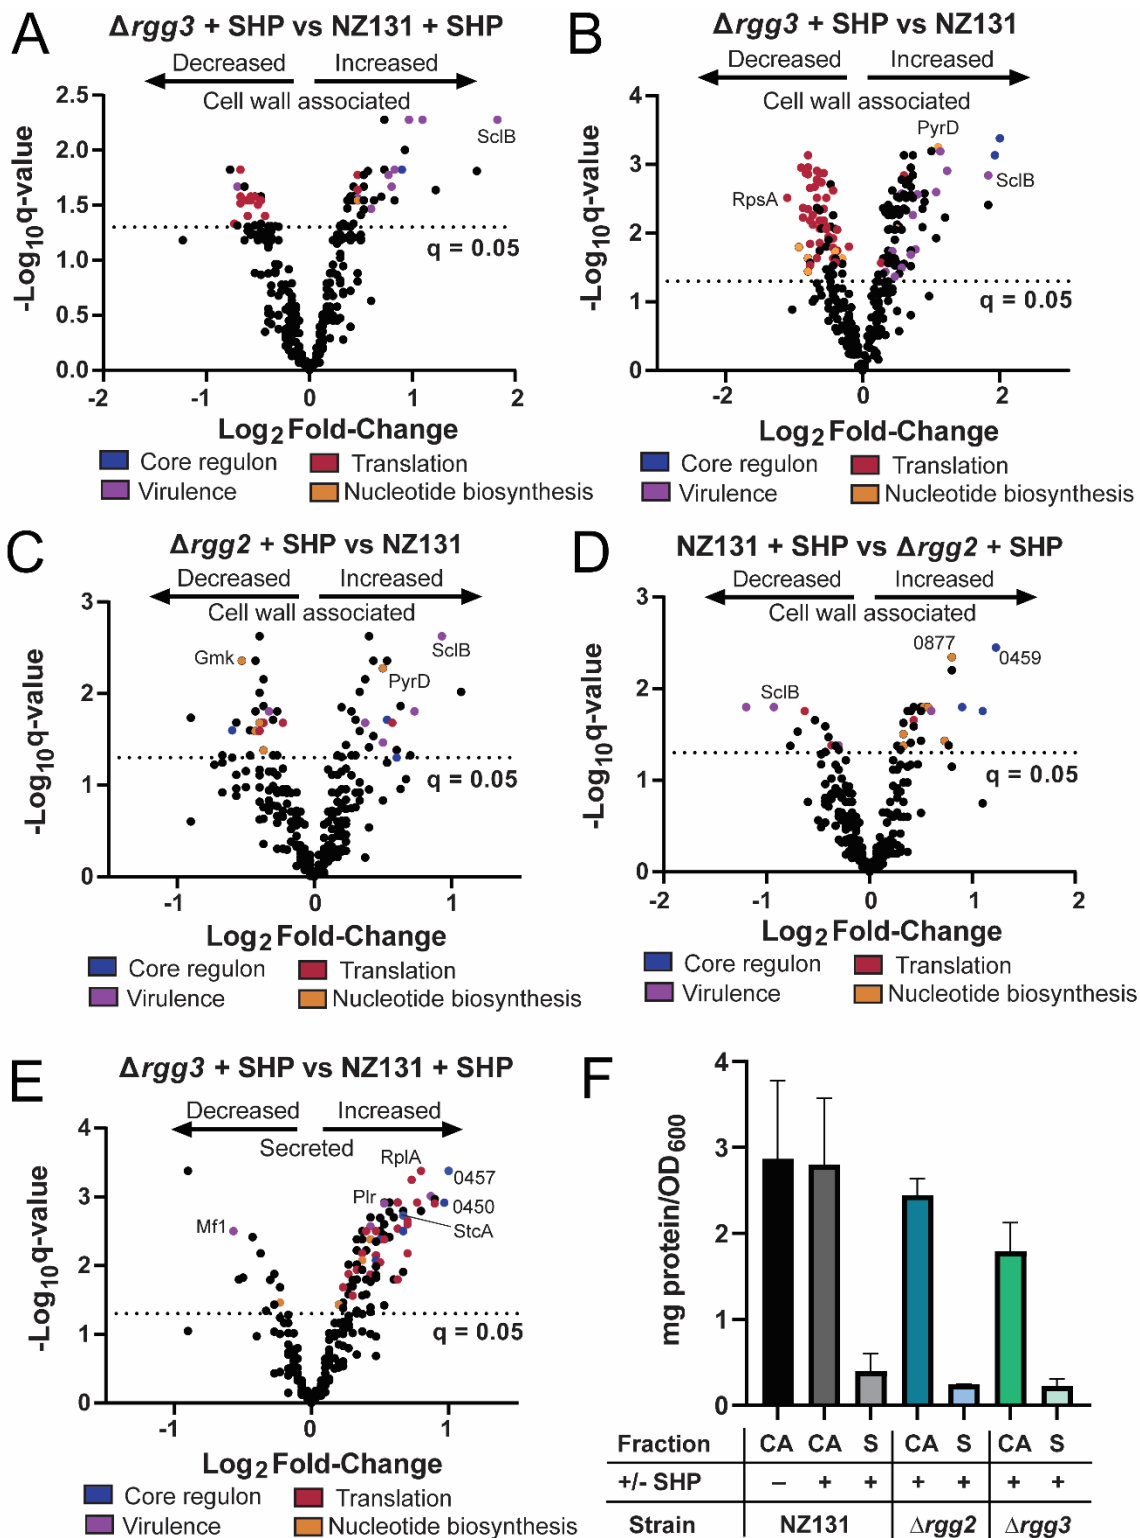

**FIGURE S2:** Data from proteomics analysis. A-E: Additional volcano plots of proteomics results. The legends below the volcano plots indicate processes or operons in which

proteins are involved in. Blue, core Rgg2/3 regulon; purple, virulence; red, translation; orange, nucleotide biosynthesis. Proteins of particular interest are also indicated on each volcano plot. For a complete list of differentially expressed proteins, TMT-LC-MS/MS results, and comparison to Wilk *et. al*, 2018 data set, see Data Sets S2-S3. A) Differentially expressed cell wall associated proteins in  $\Delta rgg3$  + SHP vs wild-type NZ131 + SHP. B) Differentially expressed cell wall associated proteins in  $\Delta rgg3$  + SHP vs wild-type NZ131. C) Differentially expressed cell wall associated proteins in  $\Delta rgg2$  + SHP vs wild-type NZ131. D) Differentially expressed cell wall associated proteins in wild-type NZ131 + SHP vs  $\Delta rgg2$  + SHP. E) Differentially expressed secreted proteins in  $\Delta rgg3$  + SHP vs wild-type NZ131 + SHP. F) Graph of total mg of protein per OD<sub>600</sub> harvested for each proteomics sample. Samples were isolated in biological triplicate. CA indicates cell wall associated, S indicates secreted. +/- indicates if 100 nM SHP was added to samples. No significant differences in protein harvest were observed between strains for either the cell associated or secreted fractions by One-way ANOVA with Tukey's Multiple Comparisons Post-Test.

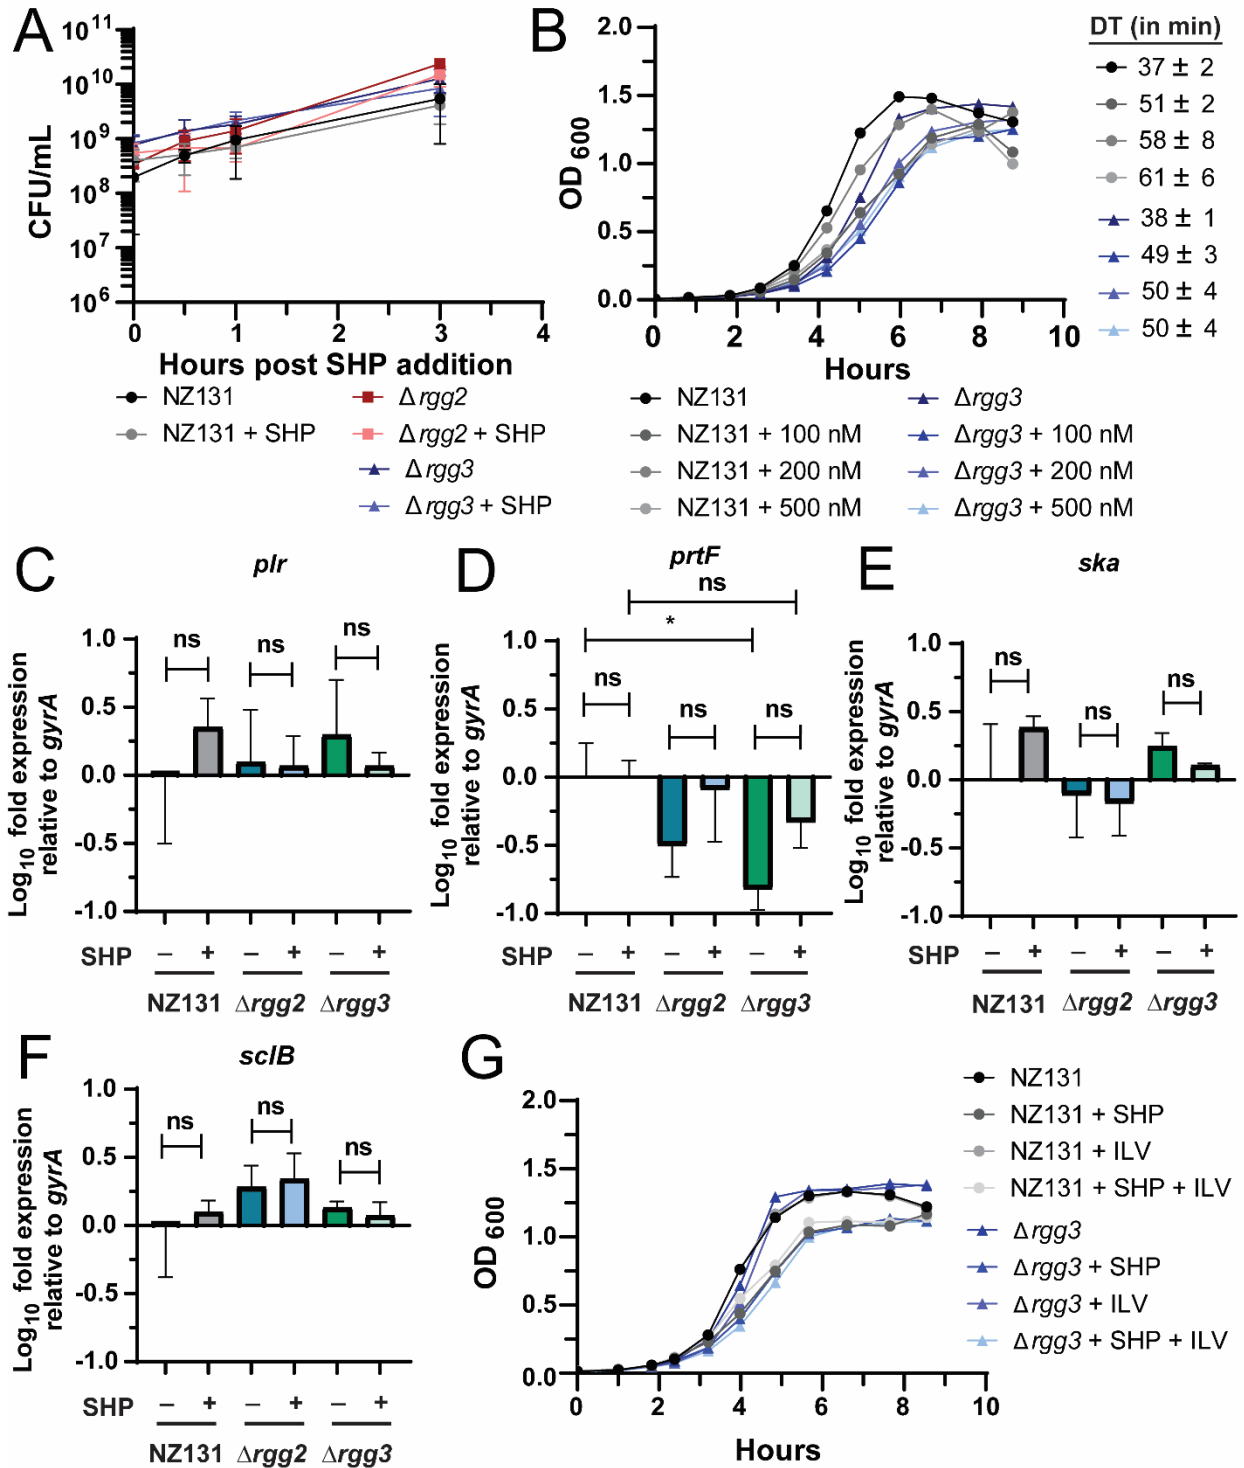

**FIGURE S3:** Results examining effects of Rgg2/3 QS induction on cells and qRT-PCR results. A) CFU/mL over time of wild-type NZ131,  $\Delta rgg2$ , and  $\Delta rgg3$  grown with or without 100 nM SHP peptide. Strains and conditions are indicated in the legend below the graph.

Graph represents the sum of three independent experiments. B) Growth curve of wild-type NZ131 and  $\Delta rgg3$  grown with increasing amounts of SHP peptide (100 nM, 200 nM, 500 nM). Strains and conditions are indicated in the legend below the graph. Mean doubling times plus/minus S.E.M. in minutes for each strain and condition are listed beside the graph. Graph is representative of four independent experiments. C-F) qRT-PCR results verifying RNA-seq and examining if proteomics targets have altered transcript levels. Wild-type NZ131,  $\Delta rgg2$ , and  $\Delta rgg3$  strains were grown in biological triplicate with or without 100 nM SHP peptide (indicated by + or – sign below each graph) and RNA was harvested at late exponential phase ( $OD_{600} \sim 0.8-1.0$ ). RNA was processed for qRT-PCR and transcript levels were determined relative to the *gyrA* reference gene. Significance of transcript level changes were determined using a One-way ANOVA with Tukey's Multiple Comparisons Post-test. \*,  $p < 0.05$ ; ns, non-significant. For further experimental details, see *Materials and Methods*. C) Relative transcript levels of *plr* (*spy49\_0234*). D) Relative transcript levels of *prtF* (*spy49\_0119*). E) Relative transcript levels of *ska* (*spy49\_1630*). F) Relative transcript levels of *scIB* (*spy49\_0830*). G) Examination of the supplementation of additional branched-chain amino acids. Growth curve of wild-type NZ131 and  $\Delta rgg3$  grown with or without 100 nM SHP and/or  $\sim 380 \mu\text{M}$  L-Ile, L-Leu, and L-Val. Strains and conditions are indicated in the legend below the graph. Mean doubling times plus/minus S.E.M. in minutes for each strain and condition are listed beside the graph. Graph is representative of two independent experiments. For further experimental details, see *Materials and Methods*.

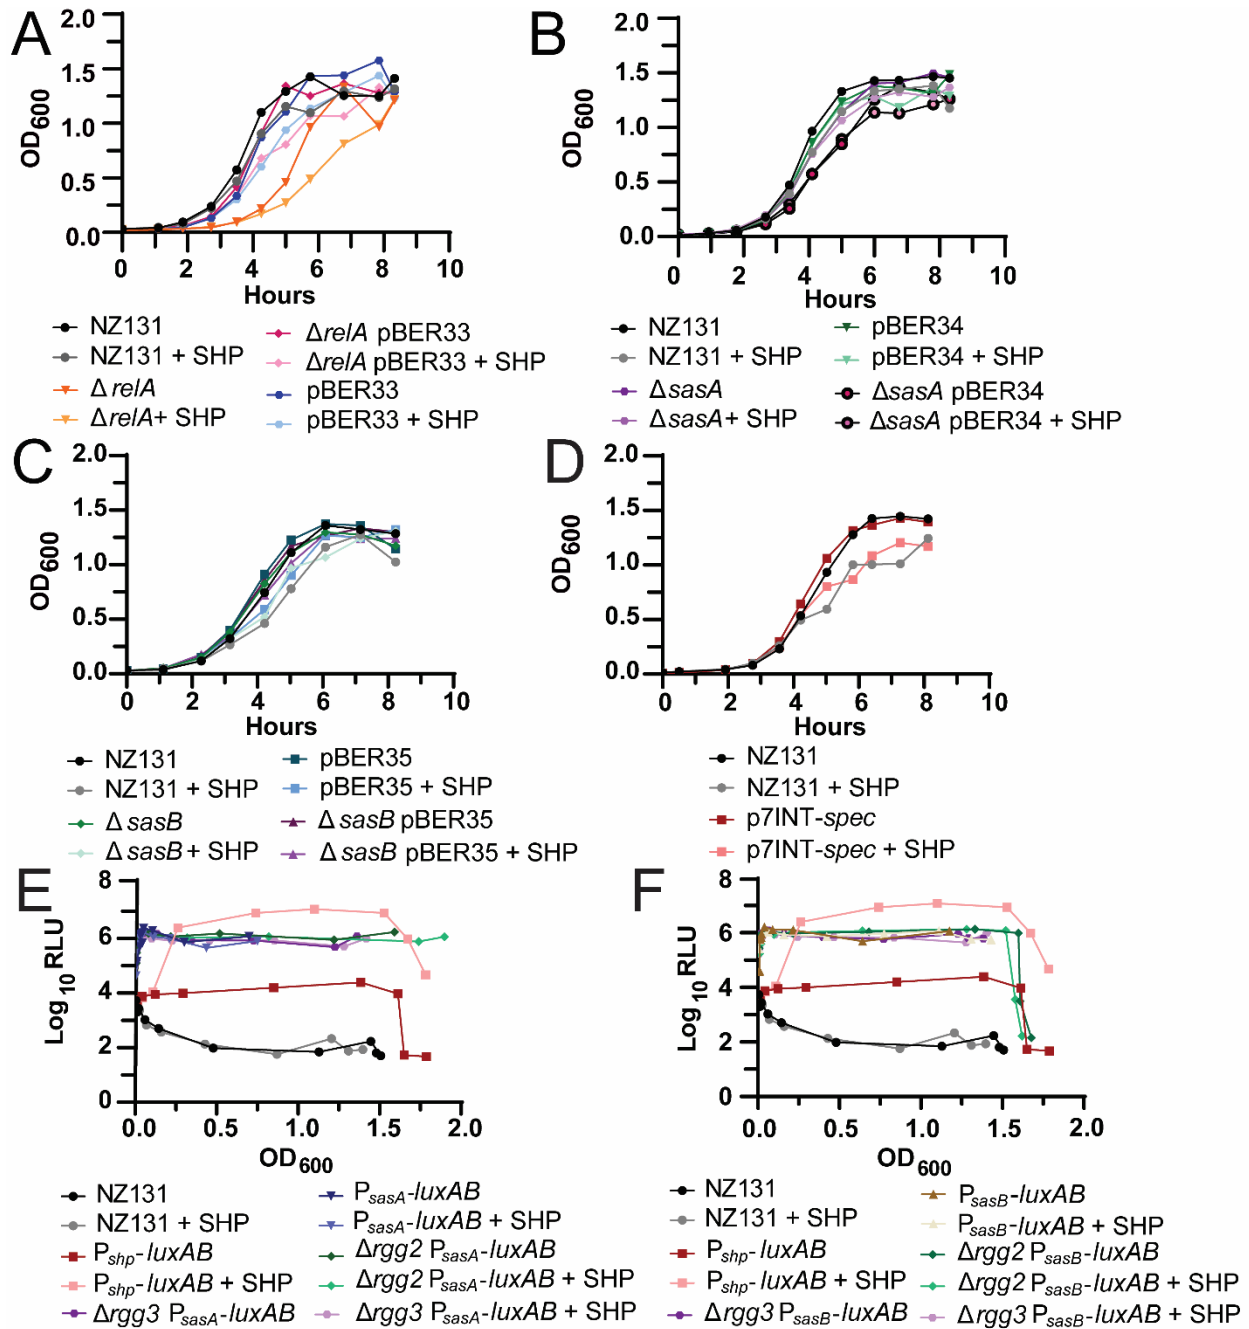

**FIGURE S4:** Growth curves of complementation and multi-copy strains for putative stringent response enzymes, and examination of transcriptional response to the Rgg2/3 system. All experiments were performed a minimum of three times. A) Growth curve of wild-type NZ131,  $\Delta relA$ , complementation, and multi-copy strains in the presence or absence of 100 nM SHP. Strains and conditions are indicated in the legend below the



graph. pBER33 indicates the *relA* complementation plasmid (p7INT-*spec-relA*). B) Growth curve of wild-type NZ131,  $\Delta sasA$ , complementation, and multi-copy strains in the presence or absence of 100 nM SHP. Strains and conditions are indicated in the legend below the graph. pBER34 indicates the *sasA* complementation plasmid (p7INT-*spec-sasA*). C) Growth curve of wild-type NZ131,  $\Delta sasB$ , complementation, and multi-copy strains in the presence or absence of 100 nM SHP. Strains and conditions are indicated in the legend below the graph. pBER35 indicates the *sasB* complementation plasmid (p7INT-*spec-sasB*). D) Growth curve of wild-type NZ131 and p7INT-*spec* empty vector. Strains were grown with or without 100 nM SHP peptide. Strains and conditions are indicated in the legend below the graph. E) Luciferase assay examining the response of *sasA* promoter to SHP induction or disruption of the Rgg2/3 system. Wild-type NZ131,  $\Delta rgg2$ , or  $\Delta rgg3$  strains containing *luxAB* reporters to  $P_{shp}$  or  $P_{sasA}$  were grown with or without 100 nM SHP peptide. Strains and conditions are indicated in the legend below the graph. F) Luciferase assay examining the response of the *sasB* promoter to SHP induction or disruption of the Rgg2/3 system. Wild-type NZ131,  $\Delta rgg2$ , or  $\Delta rgg3$  strains containing *luxAB* reporters to  $P_{shp}$  or  $P_{sasB}$  were grown with or without 100 nM SHP peptide. Strains and conditions are indicated in the legend below the graph.

**TABLE S1.** Bacterial strains, plasmids, and primers used in this study.<sup>a</sup>

| <b><i>S. pyogenes</i> strains</b> |                                                                                                                                |                                          |                  |
|-----------------------------------|--------------------------------------------------------------------------------------------------------------------------------|------------------------------------------|------------------|
| <b>Strain/Plasmid</b>             | <b>Description</b>                                                                                                             | <b>Antibiotic Resistance<sup>b</sup></b> | <b>Reference</b> |
| NZ131                             | <i>S. pyogenes</i> wild-type reference strain; M49 isolate isolated from a case of acute post-streptococcal glomerulonephritis | NR                                       | (1)              |
| BNL145                            | NZ131 $\Delta rgg2 \Delta rgg3::cat$                                                                                           | Cm <sup>R</sup>                          | (1)              |
| BNL206                            | NZ131 <i>shp2</i> <sub>GGG</sub> <i>shp3</i> <sub>GGG</sub> pJC219                                                             | Cm <sup>R</sup> , Erm <sup>R</sup>       | (2)              |
| BRSP13                            | NZ131 $\Delta relA$                                                                                                            | NR                                       | This study       |
| BRSP15                            | NZ131 $\Delta sasB$                                                                                                            | NR                                       | This study       |
| BRSP20                            | NZ131 $\Delta sasA$                                                                                                            | NR                                       | This study       |
| BRSP25                            | NZ131 $\Delta relA$ pJC219                                                                                                     | Erm <sup>R</sup>                         | This study       |
| BRSP27                            | NZ131 $\Delta sasA$ pJC219                                                                                                     | Erm <sup>R</sup>                         | This study       |
| BRSP29                            | NZ131 $\Delta sasB$ pJC219                                                                                                     | Erm <sup>R</sup>                         | This study       |
| BRSP39                            | NZ131 $\Delta relA \Delta sasA$                                                                                                | NR                                       | This study       |
| BRSP42                            | NZ131 $\Delta relA \Delta sasB$                                                                                                | NR                                       | This study       |
| BRSP44                            | NZ131 pBER33                                                                                                                   | Spec <sup>R</sup>                        | This study       |
| BRSP48                            | NZ131 $\Delta relA$ pBER33                                                                                                     | Spec <sup>R</sup>                        | This study       |
| BRSP50                            | NZ131 pBER34                                                                                                                   | Spec <sup>R</sup>                        | This study       |
| BRSP52                            | NZ131 pBER35                                                                                                                   | Spec <sup>R</sup>                        | This study       |
| BRSP55                            | NZ131 $\Delta sasB$ pBER35                                                                                                     | Spec <sup>R</sup>                        | This study       |
| BRSP57                            | NZ131 $\Delta sasA \Delta sasB$                                                                                                | NR                                       | This study       |
| BRSP58                            | NZ131 $\Delta sasA$ pBER34                                                                                                     | Spec <sup>R</sup>                        | This study       |
| BRSP60                            | NZ131 pBER37                                                                                                                   | Erm <sup>R</sup>                         | This study       |
| BRSP63                            | NZ131 pBER38                                                                                                                   | Erm <sup>R</sup>                         | This study       |
| BRSP66                            | NZ131 $\Delta relA \Delta sasA \Delta sasB$                                                                                    | NR                                       | This study       |
| BRSP67                            | NZ131 p7INT- <i>spec</i>                                                                                                       | Spec <sup>R</sup>                        | This study       |
| BRSP69                            | NZ131 $\Delta rgg2$ pBER37                                                                                                     | Erm <sup>R</sup>                         | This study       |
| BRSP72                            | NZ131 $\Delta rgg2$ pBER38                                                                                                     | Erm <sup>R</sup>                         | This study       |
| BRSP79                            | NZ131 $\Delta rgg3::cat$ pBER37                                                                                                | Cm <sup>R</sup> ; Erm <sup>R</sup>       | This study       |
| BRSP82                            | NZ131 $\Delta rgg3::cat$ pBER38                                                                                                | Cm <sup>R</sup> ; Erm <sup>R</sup>       | This study       |
| BRSP92                            | NZ131 pBER40                                                                                                                   | Spec <sup>R</sup>                        | This study       |
| BRSP94                            | NZ131 pBER41                                                                                                                   | Spec <sup>R</sup>                        | This study       |
| BRSP100                           | NZ131 pLZ12-Sp                                                                                                                 | Spec <sup>R</sup>                        | This study       |
| BRSP102                           | NZ131 $\Delta rgg2$ pBER41                                                                                                     | Spec <sup>R</sup>                        | This study       |
| BRSP105                           | NZ131 $\Delta rgg3::cat$ pBER41                                                                                                | Spec <sup>R</sup>                        | This study       |
| BRSP107                           | NZ131 $\Delta rgg2$ pBER40                                                                                                     | Spec <sup>R</sup>                        | This study       |
| BRSP110                           | NZ131 $\Delta rgg3::cat$ pBER40                                                                                                | Spec <sup>R</sup>                        | This study       |
| BRSP116                           | HSC5 pFED630                                                                                                                   | Cm <sup>R</sup>                          | This study       |
| HSC5                              | <i>S. pyogenes</i> wild-type reference strain; M14 isolate                                                                     | NR                                       | (3, 4)           |
| JCC131                            | NZ131 $\Delta rgg3::cat$                                                                                                       | Cm <sup>R</sup>                          | (1)              |
| JCC131 pJC219                     | NZ131 $\Delta rgg3::cat$ pJC219                                                                                                | Cm <sup>R</sup> ; Erm <sup>R</sup>       | (4)              |
| JCC137                            | NZ131 $\Delta rgg2$                                                                                                            | NR                                       | (1)              |
| JCC137 pJC219                     | NZ131 $\Delta rgg2$ pJC219                                                                                                     | Erm <sup>R</sup>                         | (4)              |
| JCC181                            | NZ131 pJC219                                                                                                                   | Erm <sup>R</sup>                         | (2)              |
| <b><i>E. coli</i> strains</b>     |                                                                                                                                |                                          |                  |
| DH5 $\alpha$                      | <i>Escherchia coli</i> strain for cloning                                                                                      | NR                                       | NEB              |

| TX2737             | <i>E. coli</i> K12 containing pALS13 ( $P_{tac}$ - <i>relA'</i> <sub>1-455</sub> <i>lacI'</i> ); IPTG inducible constitutive (p)ppGpp synthetase allele <i>relA'</i> | Amp <sup>R</sup>                                  |                               |                      |                                    | Gift from M.E. Winkler; (5, 6) |
|--------------------|----------------------------------------------------------------------------------------------------------------------------------------------------------------------|---------------------------------------------------|-------------------------------|----------------------|------------------------------------|--------------------------------|
| Plasmids           |                                                                                                                                                                      |                                                   |                               |                      |                                    |                                |
| Plasmid Name       | Description                                                                                                                                                          | Template <sup>c</sup>                             | Method of Const. <sup>d</sup> | RE Used <sup>e</sup> | Antibiotic Resistance <sup>b</sup> | Reference                      |
| p7INT              | Shuttle-suicide vector that integrates at streptococcal bacteriophage T12 <i>attB</i> site                                                                           | N/A                                               | N/A                           | N/A                  | Erm <sup>R</sup>                   | (7)                            |
| p7INT- <i>spec</i> | Shuttle-suicide vector that integrates at streptococcal bacteriophage T12 <i>attB</i> site; Erm cassette replaced with Spec cassette from pLZ12-Sp                   | pLZ12-Sp; p7INT; primers                          | RE                            | NcoI                 | Spec <sup>R</sup>                  | This study                     |
| pALS13             | $P_{tac}$ - <i>relA'</i> <sub>1-455</sub> <i>lacI'</i> ; IPTG inducible constitutive (p)ppGpp synthetase allele <i>relA'</i>                                         | N/A                                               | N/A                           | N/A                  | Amp <sup>R</sup>                   | Gift from M.E. Winkler; (5)    |
| pBER16             | To construct unmarked deletion of <i>relA</i> ; in pFED760                                                                                                           | pFED760; NZ131 gDNA; primers                      | Gibson + RE                   | NotI; EcoRI          | Erm <sup>R</sup>                   | This study                     |
| pBER17             | To construct unmarked deletion of <i>sasB</i> ; in pFED760                                                                                                           | pFED760; NZ131 gDNA; primers                      | Gibson + RE                   | NotI; EcoRI          | Erm <sup>R</sup>                   | This study                     |
| pBER18             | To construct unmarked deletion of <i>sasA</i> ; in pFED760                                                                                                           | pFED760; NZ131 gDNA; primers                      | Gibson + RE                   | NotI; EcoRI          | Erm <sup>R</sup>                   | This study                     |
| pBER23             | p7INT- <i>spec-L-sfGFP</i>                                                                                                                                           | p7INT- <i>spec</i> ; pY71- <i>sfGFP</i> ; primers | Gibson                        | N/A                  | Spec <sup>R</sup>                  | This study                     |
| pBER25             | p7INT- <i>spec-aroE2-L-sfGFP</i>                                                                                                                                     | pBER23; NZ131 gDNA; primers                       | Gibson                        | N/A                  | Spec <sup>R</sup>                  | This study                     |
| pBER30             | pLZ12-Sp- <i>aroE.2-L-sfGFP</i>                                                                                                                                      | pLZ12-Sp; pBER25; primers                         | Gibson                        | N/A                  | Spec <sup>R</sup>                  | This study                     |
| pBER33             | p7INT- <i>spec-relA</i>                                                                                                                                              | p7INT- <i>spec</i> ; NZ131 gDNA; primers          | Gibson                        | N/A                  | Spec <sup>R</sup>                  | This study                     |
| pBER34             | p7INT- <i>spec-sasA</i>                                                                                                                                              | p7INT- <i>spec</i> ; NZ131 gDNA; primers          | Gibson                        | N/A                  | Spec <sup>R</sup>                  | This study                     |

|         |                                                                                                                                                            |                                                   |                 |                |                                     |            |
|---------|------------------------------------------------------------------------------------------------------------------------------------------------------------|---------------------------------------------------|-----------------|----------------|-------------------------------------|------------|
| pBER35  | p7INT- <i>spec-sasB</i>                                                                                                                                    | p7INT- <i>spec</i> ;<br>NZ131<br>gDNA;<br>primers | Gibson          | N/A            | Spec <sup>R</sup>                   | This study |
| pBER37  | p7INT-P <sub><i>sasB</i></sub> - <i>luxAB</i> ;<br>219 bp DNA fragment<br>from region before<br><i>sasB</i> ( <i>spy49_0687</i> )<br>start ATG             | pJC219;<br>NZ131<br>gDNA;<br>primers              | Gibson          | N/A            | Erm <sup>R</sup>                    | This study |
| pBER38  | p7INT-P <sub><i>sasA</i></sub> - <i>luxAB</i> ;<br>150 bp DNA fragment<br>from region before<br><i>sasA</i> ( <i>spy49_0877</i> )<br>start ATG             | pJC219;<br>NZ131<br>gDNA;<br>primers              | Gibson          | N/A            | Erm <sup>R</sup>                    | This study |
| pBER40  | pLZ12-Sp- <i>aroE.2-L-<br/>sfGFP</i><br><i>shp3</i> (ATG→GGG)                                                                                              | pBER30;<br>primers                                | QC <sup>f</sup> | N/A            | Spec <sup>R</sup>                   | This study |
| pBER41  | pLZ12-Sp- <i>sasA-L-<br/>sfGFP</i>                                                                                                                         | pBER30;<br>NZ131<br>gDNA;<br>primers              | Gibson          | N/A            | Spec <sup>R</sup>                   | This study |
| pCN52   | <i>E. coli</i> -staphylococcal<br>shuttle vector<br>containing <i>cop-wt-<br/>repC</i> , <i>gfpmut2</i> , and<br><i>blaZ</i> transcriptional<br>terminator | N/A                                               | N/A             | N/A            | Amp <sup>R</sup> , Erm <sup>R</sup> | (8)        |
| pEVP3   | Plasmid encoding<br>synthetic promoter<br>and <i>cat</i><br>chloramphenicol<br>resistance cassette                                                         | N/A                                               | N/A             | N/A            | Cm <sup>R</sup>                     | (9)        |
| pFED322 | Shuttle vector<br>encoding<br>chloramphenicol<br>resistance, derived<br>from pLZ12-Sp;<br>pWV01 origin                                                     | pLZ12-Sp,<br>pEVP3;<br>primers                    | RE              | PacI           | Cm <sup>R</sup>                     | This study |
| pFED576 | pCN52 with P <sub><i>rmB</i></sub> from<br><i>S. pyogenes</i> driving<br><i>gfp</i>                                                                        | pCN52;<br>NZ131<br>gDNA;<br>primers               | RE              | EcoRI;<br>ScaI | Amp <sup>R</sup> , Erm <sup>R</sup> | This study |
| pFED601 | pFED576 with <i>luxS</i><br>from <i>S.pyogenes</i> , P <sub><i>rmB</i></sub> -<br><i>luxS-gfp</i>                                                          | pFED576;<br>NZ131<br>gDNA;<br>primers             | RE              | EcoRI          | Amp <sup>R</sup> , Erm <sup>R</sup> | This study |
| pFED630 | pFED322 with P <sub><i>rmB</i></sub> -<br><i>luxS</i> and <i>gfp</i> ;                                                                                     | pFED322;<br>pFED601                               | RE              | PacI; XbaI     | Cm <sup>R</sup>                     | This study |
| pFED760 | pGh9-ISS1 derivative<br>deleted for ISS1                                                                                                                   | N/A                                               | N/A             | N/A            | Erm <sup>R</sup>                    | (10)       |
| pJC219  | p7INT-P <sub><i>shp3</i></sub> - <i>luxAB</i><br>(384 bp DNA fragment<br>containing <i>shp3</i><br>promoter fused to<br><i>luxAB</i> )                     | N/A                                               | N/A             | N/A            | Erm <sup>R</sup>                    | (2)        |

| pLZ12-Sp                                                       | Shuttle vector encoding spectinomycin resistance; pWV01 origin | N/A                   | N/A                  | N/A                                      | Spec <sup>R</sup> | (11)                                            |
|----------------------------------------------------------------|----------------------------------------------------------------|-----------------------|----------------------|------------------------------------------|-------------------|-------------------------------------------------|
| pY71-sfGFP                                                     | P <sub>T7</sub> ::sfGFP, C-terminal Strep-tag                  | N/A                   | N/A                  | N/A                                      | Kan <sup>R</sup>  | Gift from S. Mankin and N. Vazquez-Laslop; (12) |
| <b>Primers used for strain construction</b>                    |                                                                |                       |                      |                                          |                   |                                                 |
| Primer                                                         | Sequence (5' to 3')                                            | Template <sup>c</sup> | RE Used <sup>e</sup> | Amplicon or Plasmid Product              |                   |                                                 |
| For construction of p7INT- <i>spec</i>                         |                                                                |                       |                      |                                          |                   |                                                 |
| JC601                                                          | CATG <b>CCATGG</b> CACGTTACTAAAGGGAATGTAG                      | p7INT                 | NcoI                 | p7INT backbone without Erm cassette      |                   |                                                 |
| JC602                                                          | CATG <b>CCATGG</b> TTTGCTTCTAAGTCTTATTCC                       |                       |                      |                                          |                   |                                                 |
| JJ89                                                           | CATG <b>CCATGG</b> TAACGTGACTGGCAAGA                           | pLZ12-Sp              | NcoI                 | Spec cassette                            |                   |                                                 |
| JJ90                                                           | CATG <b>CCATGG</b> GAATGAATATTTCCCAAATATT                      |                       |                      |                                          |                   |                                                 |
| For construction of pBER16 to construct $\Delta reIA$ , BRSP13 |                                                                |                       |                      |                                          |                   |                                                 |
| BR114                                                          | GGATCCCACCGCGGTG <b>GCGGCCGC</b> GTGAACAAGGAATCCAAGG           | NZ131 gDNA            | NotI                 | 5' flanking region of <i>reIA</i>        |                   |                                                 |
| BR198                                                          | TTATCCTTTCTTCGTTCTCATCTAGCATTTCTTTTC                           |                       | N/A                  |                                          |                   |                                                 |
| BR199                                                          | GAGGAACGAAGAAAGGATAAAAACATGA AACTTGTC                          | NZ131 gDNA            | N/A                  | 3' flanking region of <i>reIA</i>        |                   |                                                 |
| BR119                                                          | AAGCTTGATAATTCG <b>GAATTC</b> TATTTCTGAGAAATATTACGTCCTTAA      |                       | EcoRI                |                                          |                   |                                                 |
| For construction of pBER17 to construct $\Delta sasB$ , BRSP15 |                                                                |                       |                      |                                          |                   |                                                 |
| BR108                                                          | CCCACCGCGGTG <b>GCGGCCGC</b> ACACCATCTTTACTTGTTGC              | NZ131 gDNA            | NotI                 | 5' region flanking region of <i>sasB</i> |                   |                                                 |
| BR196                                                          | ATTTTCATGGACGCTTATTATAACAAATT TCTCAAC                          |                       | N/A                  |                                          |                   |                                                 |
| BR197                                                          | TAATAAGCGTCCATGAAAATTTTGTTAGC TGAAGACG                         | NZ131 gDNA            | N/A                  | 3' flanking region of <i>sasB</i>        |                   |                                                 |
| BR113                                                          | AGCTTGATAATTCG <b>GAATTC</b> GTAAGTGCCTTTTCTTCCC               |                       | EcoRI                |                                          |                   |                                                 |
| For construction of pBER18 to construct $\Delta sasA$ , BRSP20 |                                                                |                       |                      |                                          |                   |                                                 |
| BR102                                                          | GGATCCCACCGCGGTG <b>GCGGCCGC</b> TCA TTGACAGGAAAAGTAGTG        | NZ131 gDNA            | NotI                 | 5' flanking region of <i>sasA</i>        |                   |                                                 |
| BR194                                                          | TCTGTGTCATCTATTGTCTCCTTTCTTGTCAAAGC                            |                       | N/A                  |                                          |                   |                                                 |
| BR195                                                          | GAGACAATAGATGACACAGATGAATTAT ACAGGTAAGGTAAAG                   | NZ131 gDNA            | N/A                  | 3' flanking region of <i>sasA</i>        |                   |                                                 |
| BR107                                                          | AAGCTTGATAATTCG <b>GAATTC</b> CATGGCTTCAAGCTTTTCAA             |                       | EcoRI                |                                          |                   |                                                 |

|                                                          |                                                                                        |                    |      |                               |
|----------------------------------------------------------|----------------------------------------------------------------------------------------|--------------------|------|-------------------------------|
| BR208                                                    | TCCTGTCAATGAG <u>GCGGCCGCC</u> CACCGCGGTG                                              | Plasmid backbone   | NotI | Intermediate plasmid backbone |
| For construction of pBER23 (p7INT- <i>spec-L-sfGFP</i> ) |                                                                                        |                    |      |                               |
| BR271                                                    | CAGCTGAACCCCCGGGGTACCGAATTC                                                            | p7INT-Sp           | N/A  | p7INT-Sp backbone             |
| BR272                                                    | CGAAAAATAATTCGAAATCGATAAGCTTG                                                          |                    |      |                               |
| BR273                                                    | GTACCCCGGGGGTTCAGCTGGTTCAGCTGCTGGTTCAGGTGAATTCATGAGCAAA                                | pY71-sfGFP         |      | L-sfGFP                       |
| BR274                                                    | GGTGAAGA<br>CGATTTTCAATTATTTTTTCTGAACTGCGGATGG                                         |                    |      |                               |
| To construct pBER25 (p7INT- <i>spec-aroE.2-L-sfGFP</i> ) |                                                                                        |                    |      |                               |
| BR279                                                    | ATTAGTCTGTCCCAGGGTACCGAATTC                                                            | pBER23             | N/A  | pBER23 backbone               |
| BR280                                                    | AAAAGGAAAAGGTTTCAGCTGGTTCAGCTG                                                         |                    |      |                               |
| BR281                                                    | GTACCCCGGGACAGACTAATTTGCTTTC                                                           | NZ131 gDNA         |      | AroE.2                        |
| BR282                                                    | CAGCTGAACCTTTTCTTTTATCTTCCCTTC                                                         |                    |      |                               |
| To construct pBER30 (pLZ12-Sp- <i>aroE.2-L-sfGFP</i> )   |                                                                                        |                    |      |                               |
| BR293                                                    | ATTAGTCTGTGGCACGACAGGTTTCCCG                                                           | pLZ12-Sp           | N/A  | pLZ12-Sp backbone             |
| BR294                                                    | CGAAAAATAAAGGACCAGACATTACGAA                                                           |                    |      |                               |
| BR295                                                    | CTGTCGTGCCACAGACTAATTTGCTTTC                                                           | pBER25             |      | AroE.2-L-sfGFP                |
| BR296                                                    | C                                                                                      |                    |      |                               |
| To construct pBER33 (p7INT- <i>spec-relA</i> )           |                                                                                        |                    |      |                               |
| BR333                                                    | CTCTCAGGCGGAATTCCTCGAGTCTAGA                                                           | p7INT- <i>spec</i> | N/A  | p7INT- <i>spec</i> backbone   |
| BR334                                                    | G                                                                                      |                    |      |                               |
| BR335                                                    | CAATGGCTAAGGTACCCCGGGTTCGAA                                                            | NZ131 gDNA         |      | <i>relA</i> CDS               |
| BR336                                                    | ATCGATAAG<br>CGAGGAATTCGCGCTGAGAGATCCCAA<br>AAG<br>CCGGGGTACCTTAGCCATTGGTCCGCTTC       |                    |      |                               |
| To construct pBER34 (p7INT- <i>spec-sasA</i> )           |                                                                                        |                    |      |                               |
| BR337                                                    | CCGTCTTTTAGAATTCCTCGAGTCTAGA                                                           | p7INT- <i>spec</i> | N/A  | p7INT- <i>spec</i> backbone   |
| BR338                                                    | G                                                                                      |                    |      |                               |
| BR339                                                    | ATACAGGTAAGGTACCCCGGGTTCGAA                                                            | NZ131 gDNA         |      | <i>sasA</i> CDS               |
| BR340                                                    | TC<br>CGAGGAATTCTAAAAGACGGTTATACTC<br>ATTTTTG<br>CCGGGGTACCTTACCTGTATAATTCATC<br>TG TG |                    |      |                               |
| To construct pBER35 (p7INT- <i>spec-sasB</i> )           |                                                                                        |                    |      |                               |
| BR341                                                    | TTAAAAATACGAATTCCTCGAGTCTAGA                                                           | p7INT- <i>spec</i> | N/A  | p7INT- <i>spec</i> backbone   |
| BR342                                                    | G                                                                                      |                    |      |                               |
| BR343                                                    | GGAAGAGTAAGGTACCCCGGGTTCGAA                                                            | NZ131 gDNA         |      | <i>sasB</i> CDS               |
|                                                          | ATC<br>CGAGGAATTCGTATTTTTTAAAAAATAACG<br>TACAAAAAATATATGAAAG                           |                    |      |                               |

|                                                             |                                                                       |                                                      |       |                                   |
|-------------------------------------------------------------|-----------------------------------------------------------------------|------------------------------------------------------|-------|-----------------------------------|
| BR344                                                       | CCGGGGTACCTTACTCTTCCTCCGTCGT<br>TTC                                   |                                                      |       |                                   |
| To construct pBER37 (p7INT-P <sub>sasB</sub> -luxAB)        |                                                                       |                                                      |       |                                   |
| BR359                                                       | AGGAGATTTTGGATCCGGAGAGCTCCC<br>AAC                                    | pJC219                                               | N/A   | pJC219<br>backbone                |
| BR360                                                       | TAATAAGCGTATGAAGTTTGGAAATATTT<br>GTTTTTC                              |                                                      |       |                                   |
| BR361                                                       | CTCCGGATCCAAAATCTCCTAATAAGTT<br>AACGTAATC                             | NZ131<br>gDNA                                        |       | sasB<br>predicted<br>promoter     |
| BR362                                                       | CAAACCTTCATACGCTTATTATAACAAATT<br>TTCTC                               |                                                      |       |                                   |
| To construct pBER38 (p7INT-P <sub>sasA</sub> -luxAB)        |                                                                       |                                                      |       |                                   |
| BR363                                                       | CCGTCTTTTAGGATCCGGAGAGCTCCCA<br>AC                                    | pJC219                                               | N/A   | pJC219<br>backbone                |
| BR364                                                       | GAGACAATAGATGAAGTTTGGAAATATT<br>TGTTTTTC                              |                                                      |       |                                   |
| BR365                                                       | CTCCGGATCCTAAAAGACGGTTATACTC<br>ATTTTTTG                              | NZ131<br>gDNA                                        |       | sasA<br>predicted<br>promoter     |
| BR366                                                       | CAAACCTTCATCTATTGTCTCCTTTCTTGT<br>C                                   |                                                      |       |                                   |
| To construct pBER40 (pLZ12-Sp-aroE.2-L-sfGFP shp3(ATG→GGG)) |                                                                       |                                                      |       |                                   |
| JC139                                                       | CAATAAATAAAACTGAAAGGAAGTCCA<br>CTTGGAAGAAAATTTCAAATTTTTGCC<br>GATTTTA | pBER30                                               | N/A   | QC <sup>f</sup> of<br>pBER30      |
| JC140                                                       | TAAAATCGGCAAAAATTTGAAATTTTCT<br>TCCAAGTGGACTTCTTTCAGTTTTTAT<br>TTATTG |                                                      |       |                                   |
| To construct pBER41 (pLZ12-Sp-sasA-L-sfGFP)                 |                                                                       |                                                      |       |                                   |
| BR301                                                       | GGAATTTCCCGGCACGACAGGTTTCCC<br>G                                      | pBER30                                               | N/A   | pBER30<br>backbone                |
| BR302                                                       | ATTATACAGGGGTTTCAGCTGGTTCAGCT<br>G                                    |                                                      |       |                                   |
| BR303                                                       | CTGTCGTGCCGGAAATTCCTTTTAATT<br>TGTG                                   | NZ131<br>gDNA                                        | N/A   | sasA CDS<br>without stop<br>codon |
| BR304                                                       | CAGCTGAACCCCTGTATAATTCATCTGT<br>GTC                                   |                                                      |       |                                   |
| To construct pFED322                                        |                                                                       |                                                      |       |                                   |
| pLZ12-S3                                                    | CCTCCTCACTATTTTGATTAGTACC                                             | pLZ12-Sp                                             | PacI  | pLZ12-Sp<br>backbone              |
| pLZ12-A2                                                    | GCGTGTTAATTAAAGGAGAGAATATTGAA<br>TGGACT                               |                                                      |       |                                   |
| To construct pFED576 (P <sub>rrmB</sub> -gfp)               |                                                                       |                                                      |       |                                   |
| PrrnB-S1-EcoRI                                              | GCGTGGAATTCCTAGCGGGAACACTC<br>ATCAT                                   | NZ131<br>gDNA                                        | EcoRI | rrmB<br>promoter                  |
| PrrnB-A1-Scal                                               | GCGTGAGTACTCCCTCACGTTTGGTTCG<br>T                                     |                                                      | Scal  |                                   |
| To construct pFED601 (P <sub>rrmB</sub> -luxS-gfp)          |                                                                       |                                                      |       |                                   |
| luxS-EXT-S-Eco                                              | GCGTGGAATTCGTGTAACAAAGGAG<br>ATTGAAATG                                | NZ131<br>gDNA                                        | EcoRI | luxS CDS                          |
| luxS-EXT-A-Eco                                              | GCGTGGAATTCACACTAGTATCAGATGA<br>CAT                                   |                                                      |       |                                   |
| <b>Primers for qRT-PCR</b>                                  |                                                                       |                                                      |       |                                   |
| Primer                                                      | Sequence (5' to 3')                                                   | Description                                          |       |                                   |
| KMT043                                                      | GTTATCGAGATTCGTCGAG                                                   | Forward primer for <i>gyrA</i> ( <i>spy49_0905</i> ) |       |                                   |
| KMT044                                                      | CACACCATTTTCAATAGCC                                                   | Reverse primer for <i>gyrA</i> ( <i>spy49_0905</i> ) |       |                                   |

|                      |                           |                                                         |
|----------------------|---------------------------|---------------------------------------------------------|
| BR188                | TCACAGCTCCTGGTGGAAC       | Forward primer for <i>plr</i> ( <i>spy49_0234</i> )     |
| BR189                | GTCACCAGTGTAAGCGTGGA      | Reverse primer for <i>plr</i> ( <i>spy49_0234</i> )     |
| BR120                | AAACCTGCCGAACAGATGGT      | Forward primer for <i>prtF</i> ( <i>spy49_0119</i> )    |
| BR121                | CTTTGCTGGGCGTTGATCTG      | Reverse primer for <i>prtF</i> ( <i>spy49_0119</i> )    |
| BR134                | GCGTCAACGACAAGACATGA      | Forward primer for <i>sasA</i> ( <i>spy49_0877</i> )    |
| BR135                | CAGGGTACTCAACCACCACA      | Reverse primer for <i>sasA</i> ( <i>spy49_0877</i> )    |
| BR130                | ACGTGGTGACAAGGGTGAAA      | Forward primer for <i>sclB</i> ( <i>spy49_0830</i> )    |
| BR131                | GGACCTACTGGACCACGTTC      | Reverse primer for <i>sclB</i> ( <i>spy49_0830</i> )    |
| BR124                | CGAGTTTCAAGCCCCTGAGT      | Forward primer for <i>sfbX49</i> ( <i>spy49_1683c</i> ) |
| BR125                | CGTTAGCTGGGTCACCTGGT      | Reverse primer for <i>sfbX49</i> ( <i>spy49_1683c</i> ) |
| BR122                | CGACCCAACCTGTCCAAGAA      | Forward primer for <i>ska</i> ( <i>spy49_1630</i> )     |
| BR123                | GCAGAGTTGTGAACGGCTTT      | Reverse primer for <i>ska</i> ( <i>spy49_1630</i> )     |
| BR128                | GGTGGTTCGGCTATCTTAGCA     | Forward primer for <i>upp</i> ( <i>spy49_0322</i> )     |
| BR129                | CCCTTCTGGTGCTGCAACTA      | Reverse primer for <i>upp</i> ( <i>spy49_0322</i> )     |
| LC074                | CCTAATAATCCTGCGGATGTGTTG  | Forward primer for <i>slo</i> ( <i>spy49_0146</i> )     |
| LC075                | GTTTCGACCATAGGCTACGTTAC   | Reverse primer for <i>slo</i> ( <i>spy49_0146</i> )     |
| KL1                  | CAGCCCTAAACCACCATTCC      | Forward primer for <i>stcA</i> ( <i>spy49_0414c</i> )   |
| KL2                  | GATTTGATAGCGCTGTCCCC      | Reverse primer for <i>stcA</i> ( <i>spy49_0414c</i> )   |
| spy49_0450_F1_<br>RW | CAGGAACTAATACTGATTGGAAAGG | Forward primer for <i>aroE.2</i> ( <i>spy49_0450</i> )  |
| spy49_0450_R1_<br>RW | CAACTGTTGGTGAGATTTGTAGTT  | Reverse primer for <i>aroE.2</i> ( <i>spy49_0450</i> )  |

<sup>a</sup>Strains were constructed as described in *Materials and Methods*.

<sup>b</sup>Antibiotic resistance markers: NR, no resistance markers; Amp<sup>R</sup>, ampicillin resistance; Spec<sup>R</sup>, spectinomycin resistance; Erm<sup>R</sup>, erythromycin resistance; Kan<sup>R</sup>, kanamycin resistance; Cm<sup>R</sup>, chloramphenicol resistance.

<sup>c</sup>Templates indicates plasmid or gDNA (genomic DNA) templates used to construct plasmids or constructs. Primers indicates that primers were used to amplify templates during construction of plasmid. N/A indicates plasmid has already been published, see reference for construction.

<sup>d</sup>Method of Const. indicates method of construction used to obtain plasmids. Gibson indicates plasmids were assembled by PCR amplification of fragments and resulting Gibson assembly, whereas RE indicates plasmids were obtained by restriction enzyme digest and resulting ligation of fragments. Gibson + RE indicates both methods were used. N/A indicates plasmid has already been published, see reference. For further details, see *Materials and Methods*.

<sup>e</sup>RE used indicated restriction enzymes or site used. N/A not applicable or plasmid already published, see reference. Site is highlighted in primers as underlined and bolded nucleotides.

<sup>f</sup>QC indicates quick change mutagenesis.



**TABLE S2.** Doubling times of strains with or without 100 nM SHP or revSHP peptide.<sup>a</sup>

| Genotype                                              | Doubling Time $\pm$ S.E.M. <sup>b</sup> (in min) | Sig. <sup>c</sup> vs NZ131 <sup>d</sup> | Sig. vs. NZ131 + SHP <sup>d</sup> | Sig. vs No SHP condition <sup>d,e</sup> |
|-------------------------------------------------------|--------------------------------------------------|-----------------------------------------|-----------------------------------|-----------------------------------------|
| NZ131                                                 | 36 $\pm$ 1                                       | N/A                                     | ****                              | N/A                                     |
| NZ131 + SHP                                           | 47 $\pm$ 1                                       | ****                                    | N/A                               | ****                                    |
| NZ131 + revSHP                                        | 36 $\pm$ 2                                       | ns                                      | ns                                | ns                                      |
| $\Delta$ rgg2                                         | 35 $\pm$ 1                                       | ns                                      | **                                | N/A                                     |
| $\Delta$ rgg2 + SHP                                   | 34 $\pm$ 2                                       | ns                                      | ***                               | ns                                      |
| $\Delta$ rgg3:: <i>cat</i>                            | 38 $\pm$ 2                                       | ns                                      | **                                | N/A                                     |
| $\Delta$ rgg3:: <i>cat</i> + SHP                      | 52 $\pm$ 2                                       | ****                                    | ns                                | ****                                    |
| $\Delta$ rgg2 $\Delta$ rgg3:: <i>cat</i>              | 40 $\pm$ 3                                       | ns                                      | ns                                | N/A                                     |
| $\Delta$ rgg2 $\Delta$ rgg3:: <i>cat</i> + SHP        | 36 $\pm$ 3                                       | ns                                      | ns                                | ns                                      |
| $\Delta$ relA                                         | 41 $\pm$ 1                                       | ns                                      | ns                                | N/A                                     |
| $\Delta$ relA + SHP                                   | 62 $\pm$ 2                                       | ****                                    | ****                              | ****                                    |
| $\Delta$ sasA                                         | 43 $\pm$ 2                                       | *                                       | ns                                | N/A                                     |
| $\Delta$ sasA + SHP                                   | 47 $\pm$ 2                                       | ****                                    | ns                                | ns                                      |
| $\Delta$ sasB                                         | 37 $\pm$ 2                                       | ns                                      | **                                | N/A                                     |
| $\Delta$ sasB + SHP                                   | 47 $\pm$ 3                                       | ***                                     | ns                                | *                                       |
| $\Delta$ relA $\Delta$ sasA                           | 37 $\pm$ 2                                       | ns                                      | ns                                | N/A                                     |
| $\Delta$ relA $\Delta$ sasA + SHP                     | 47 $\pm$ 3                                       | ns                                      | ns                                | ns                                      |
| $\Delta$ relA $\Delta$ sasB                           | 38 $\pm$ 3                                       | ns                                      | ns                                | N/A                                     |
| $\Delta$ relA $\Delta$ sasB + SHP                     | 50 $\pm$ 3                                       | **                                      | ns                                | ns                                      |
| $\Delta$ sasA $\Delta$ sasB                           | 36 $\pm$ 1                                       | ns                                      | ns                                | N/A                                     |
| $\Delta$ sasA $\Delta$ sasB + SHP                     | 39 $\pm$ 2                                       | ns                                      | ns                                | ns                                      |
| $\Delta$ relA $\Delta$ sasA $\Delta$ sasB             | 62 $\pm$ 8                                       | ****                                    | **                                | N/A                                     |
| $\Delta$ relA $\Delta$ sasA $\Delta$ sasB + SHP       | 72 $\pm$ 5                                       | ****                                    | ****                              | ns                                      |
| $\Delta$ relA pBER33 (p7INT- <i>spec-relA</i> )       | 34 $\pm$ 2                                       | ns                                      | ns                                | N/A                                     |
| $\Delta$ relA pBER33 (p7INT- <i>spec-relA</i> ) + SHP | 42 $\pm$ 2                                       | ns                                      | ns                                | ns                                      |
| $\Delta$ sasA pBER34 (p7INT- <i>spec-sasA</i> )       | 38 $\pm$ 1                                       | ns                                      | ns                                | N/A                                     |
| $\Delta$ sasA pBER34 (p7INT- <i>spec-sasA</i> ) + SHP | 42 $\pm$ 0.1                                     | ns                                      | ns                                | ns                                      |
| $\Delta$ sasB pBER35 (p7INT- <i>spec-sasB</i> )       | 39 $\pm$ 6                                       | ns                                      | ns                                | N/A                                     |
| $\Delta$ sasB pBER35 (p7INT- <i>spec-sasB</i> ) + SHP | 47 $\pm$ 5                                       | ns                                      | ns                                | ns                                      |
| NZ131 p7INT- <i>spec</i>                              | 32 $\pm$ 3                                       | ns                                      | ns                                | N/A                                     |
| NZ131 p7INT- <i>spec</i> + SHP                        | 35 $\pm$ 4                                       | ns                                      | ns                                | ns                                      |
| pBER33 (p7INT- <i>spec-relA</i> )                     | 36 $\pm$ 3                                       | ns                                      | ns                                | N/A                                     |

|                                         |        |    |    |     |
|-----------------------------------------|--------|----|----|-----|
| pBER33 (p7INT- <i>spec-relA</i> ) + SHP | 43 ± 2 | ns | ns | ns  |
| pBER34 (p7INT- <i>spec-sasA</i> )       | 38 ± 2 | ns | ns | N/A |
| pBER34 (p7INT- <i>spec-sasA</i> ) + SHP | 45 ± 4 | ns | ns | ns  |
| pBER35 (p7INT- <i>spec-sasB</i> )       | 40 ± 4 | ns | ns | N/A |
| pBER35 (p7INT- <i>spec-sasB</i> ) + SHP | 53 ± 9 | ** | ns | ns  |

<sup>a</sup>SHP refers to SHP3-C8 peptide and revSHP refers to reverse sequence peptide of SHP3-C8 peptide, see *Materials and Methods* for further details.

<sup>b</sup>S.E.M. is Standard Error of Mean.

<sup>c</sup>Sig. stands for significantly.

<sup>d</sup>Stars indicate statistical significance via a One-way Anova with a Šidák's or Dunnett's Multiple Comparisons Post-Test. \*,  $p < 0.05$ ; \*\*,  $p < 0.005$ ; \*\*\*,  $p < 0.0005$ ; \*\*\*\*,  $p < 0.0001$ .

<sup>e</sup>Versus the doubling time for the same strain, without addition of SHP peptide.

## REFERENCES FOR SUPPLEMENTAL INFORMATION

1. Chang JC, LaSarre B, Jimenez JC, Aggarwal C, Federle MJ. 2011. Two group A streptococcal peptide pheromones act through opposing rgg regulators to control biofilm development. *PLoS Pathogens* 7:e1002190.
2. LaSarre B, Chang JC, Federle MJ. 2013. Redundant Group A Streptococcus Signaling Peptides Exhibit Unique Activation Potentials. *Journal of Bacteriology* 195:4310–4318.
3. Port GC, Paluscio E, Caparon MG. 2013. Complete genome sequence of emm type 14 *Streptococcus pyogenes* strain HSC5. *Genome Announcements* 1:e00612-13.
4. Chang JC, Jimenez JC, Federle MJ. 2015. Induction of a quorum sensing pathway by environmental signals enhances group A streptococcal resistance to lysozyme. *Molecular Microbiology* 97:1097–113.
5. Svitil AL, Cashel M, Zyskind JW. 1993. Guanosine tetraphosphate inhibits protein synthesis *in vivo*. A possible protective mechanism for starvation stress in *Escherichia coli*. *J Biol Chem* 268:2307–11.
6. Kazmierczak KM, Wayne KJ, Rechtsteiner A, Winkler ME. 2009. Roles of relSpn in stringent response, global regulation and virulence of serotype 2 *Streptococcus pneumoniae* D39. *Molecular Microbiology* <https://doi.org/10.1111/j.1365-2958.2009.06669.x>.
7. McShan WM, McLaughlin RE, Nordstrand A, Ferretti JJ. 1998. Vectors containing streptococcal bacteriophage integrases for site-specific gene insertion, p. 51–57. *In* Methods for studying the genetics, molecular biology, physiology, and pathogenesis of the streptococci. Springer Netherlands, Dordrecht.
8. Charpentier E, Anton AI, Barry P, Alfonso B, Fang Y, Novick RP. 2004. Novel Cassette-Based Shuttle Vector System for Gram-Positive Bacteria. *Applied and Environmental Microbiology* 70:6076–6085.
9. Pestova EV, Morrison DA. 1998. Isolation and characterization of three *Streptococcus pneumoniae* transformation-specific loci by use of a *lacZ* reporter insertion vector. *J Bacteriol* 180:2701–10.
10. Mashburn-Warren L, Morrison DA, Federle MJ. 2010. A novel double-tryptophan peptide pheromone is conserved in mutans and pyogenic Streptococci and Controls Competence in *Streptococcus mutans* via an Rgg regulator. *Molecular Microbiology* 78:589–606.
11. Husmann LK, Scott JR, Lindahl G, Stenberg L. 1995. Expression of the Arp protein, a member of the M protein family, is not sufficient to inhibit phagocytosis of *Streptococcus pyogenes*. *Infection and Immunity* 63:345–348.
12. Hong SH, Ntai I, Haimovich AD, Kelleher NL, Isaacs FJ, Jewett MC. 2014. Cell-free Protein Synthesis from a Release Factor 1 Deficient *Escherichia coli* Activates Efficient and Multiple Site-specific Nonstandard Amino Acid Incorporation. *ACS Synthetic Biology* 3:398–409.
